# Supplementary material
Source: PubMed Central journal article supplement (PMC4873340)

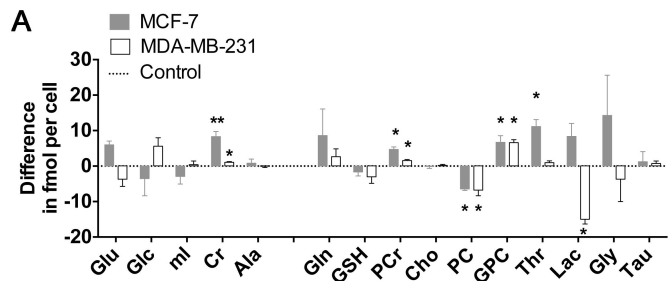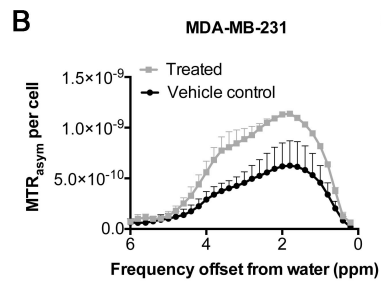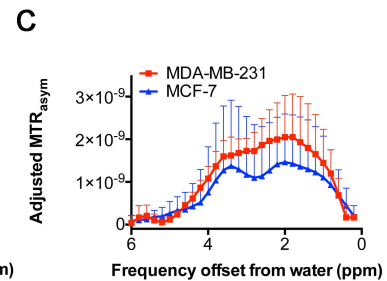

Supplement: NIHMS780511-supplement-Supp_Fig_S1.pdf [file NIHMS780511-supplement-Supp_Fig_S1.pdf]
